# Supplementary material for: The Efficacy and Safety of Anti-epidermal Growth Factor Receptor Monoclonal Antibodies in Nasopharyngeal Carcinoma: Literature-based Meta-analyses
Source: PubMed Central journal article supplement — J Cancer. 2018 Oct 31;9(23):4510–20. doi: 10.7150/jca.27611 (PMC6277641; doi:10.7150/jca.27611), 2018-10-31
Supplement: jcav09p4510s1.pdf [file jcav09p4510s1.pdf]

**Supplementary Table S1: Risk of bias in the randomized controlled trials based on the Cochrane risk of bias assessment tool**

| Study ID  | Random sequence generation | Allocation concealment | Blinding of participants and personnel | Blinding of outcome assessment | Incomplete outcome data | Selective reporting | Other bias | Assessment of study |
|-----------|----------------------------|------------------------|----------------------------------------|--------------------------------|-------------------------|---------------------|------------|---------------------|
| Liao 2016 | Unclear                    | Unclear                | Unclear                                | Unclear                        | Low                     | Low                 | Unclear    | Unclear             |
| Xu 2015   | Unclear                    | Unclear                | Unclear                                | Unclear                        | Low                     | Low                 | Unclear    | Unclear             |
| Shao 2014 | High                       | High                   | Unclear                                | Unclear                        | Low                     | Unclear             | Unclear    | High                |
| Wu 2007   | Low                        | Low                    | Unclear                                | Unclear                        | Low                     | Low                 | Unclear    | Unclear             |

**Supplementary Table S2: Risk of bias in the observational studies based on the modified Newcastle-Ottawa scale**

| Study ID     | Selection                             |                                |                                | Comparability                       |                                       | Outcome                |                            | Quality score |
|--------------|---------------------------------------|--------------------------------|--------------------------------|-------------------------------------|---------------------------------------|------------------------|----------------------------|---------------|
|              | Assignment for treatment <sup>a</sup> | Representative treatment group | Representative reference group | Comparable for 1,2,3,4 <sup>b</sup> | Comparable for 5,6,7,8,9 <sup>b</sup> | Assessment of outcomes | follow-up $\geq$ 36 months |               |
| Wang 2018    | —                                     | ☆                              | ☆                              | ☆                                   | ☆                                     | ☆                      | ☆                          | 6             |
| Wu 2018      | —                                     | ☆                              | ☆                              | ☆                                   | ☆                                     | ☆                      | ☆                          | 6             |
| Xia 2017     | —                                     | ☆                              | ☆                              | ☆☆                                  | ☆                                     | ☆                      | ☆                          | 7             |
| You 2017     | —                                     | ☆                              | ☆                              | ☆☆                                  | ☆                                     | ☆                      | ☆                          | 7             |
| You-Rui 2017 | —                                     | ☆                              | ☆                              | ☆☆                                  | ☆                                     | ☆                      | ☆                          | 7             |
| Zeng 2016    | —                                     | ☆                              | ☆                              | ☆☆                                  | —                                     | ☆                      | —                          | 5             |
| Lou 2016     | —                                     | ☆                              | ☆                              | ☆☆                                  | ☆                                     | ☆                      | ☆                          | 7             |
| Wu 2016      | —                                     | ☆                              | ☆                              | ☆☆                                  | ☆                                     | ☆                      | ☆                          | 7             |
| Li 2016      | —                                     | ☆                              | ☆                              | ☆☆                                  | ☆                                     | ☆                      | ☆                          | 7             |
| Wang 2016    | ☆                                     | ☆                              | ☆                              | ☆                                   | —                                     | ☆                      | ☆                          | 6             |
| Li 2015      | —                                     | ☆                              | ☆                              | ☆☆                                  | —                                     | ☆                      | —                          | 5             |
| Yin 2014     | —                                     | ☆                              | ☆                              | ☆☆                                  | ☆                                     | ☆                      | —                          | 6             |
| Tang 2012    | ☆                                     | ☆                              | ☆                              | ☆☆                                  | ☆                                     | ☆                      | —                          | 7             |

Comparability variables: 1 = age, 2 = gender, 3 = performance status score, 4 = disease stage, 5 = T category, 6 = N category, 7 = radiotherapy, 8 = other treatment, 9 = pretreatment plasma Epstein-Barr virus DNA.

<sup>a</sup> Details of criteria for adequate random assignment of patients to treatment were provided.

<sup>b</sup> If all variables were comparable, two stars; if one variable was not comparable, one star; otherwise, no stars.

**Supplementary Table S3. Subgroup analyses for comparison 1**

| Outcomes                    | N of studies | N of pts in mAb group | N of pts in RT/CRT group | HR/RR (95% CI)                 | P-value <sup>c</sup> | Heterogeneity  |                      |
|-----------------------------|--------------|-----------------------|--------------------------|--------------------------------|----------------------|----------------|----------------------|
|                             |              |                       |                          |                                |                      | I <sup>2</sup> | P-value <sup>c</sup> |
| <b>Cetuximab subgroup</b>   |              |                       |                          |                                |                      |                |                      |
| OS                          | 4            | 271                   | 362                      | 0.58 (0.39-0.84) <sup>a</sup>  | <b>0.004</b>         | 1%             | 0.39                 |
| DFS                         | 3            | 207                   | 288                      | 0.70 (0.51-0.96) <sup>a</sup>  | <b>0.03</b>          | 0%             | 0.54                 |
| skin rash                   | 3            | 241                   | 913                      | 7.28 (2.17-24.43) <sup>b</sup> | <b>0.001</b>         | 84%            | <b>0.002</b>         |
| mucositis                   | 4            | 277                   | 955                      | 2.31 (1.04-5.15) <sup>b</sup>  | <b>0.04</b>          | 94%            | <b>&lt; 0.001</b>    |
| <b>Nimotuzumab subgroup</b> |              |                       |                          |                                |                      |                |                      |
| OS                          | 6            | 277                   | 412                      | 0.50 (0.33-0.74) <sup>a</sup>  | <b>&lt; 0.001</b>    | 0%             | 0.58                 |
| DFS                         | 4            | 225                   | 221                      | 0.65 (0.41-1.03) <sup>a</sup>  | 0.06                 | 22%            | 0.28                 |
| skin rash                   | 2            | 117                   | 719                      | 1.19 (0.51-2.78) <sup>b</sup>  | 0.68                 | 0%             | 0.42                 |
| mucositis                   | 4            | 288                   | 886                      | 1.25 (0.81-1.94) <sup>b</sup>  | 0.31                 | 58%            | <b>0.07</b>          |

Abbreviations: N = number; pts = patients; mAb = monoclonal antibody; RT = radiotherapy; CRT = chemoradiotherapy; HR = hazard ratio; RR = risk ratio; CI = confidence interval; OS = overall survival; DFS = disease-free survival.

<sup>a</sup> Hazard ratio.

<sup>b</sup> Risk ratio.

<sup>c</sup> Statistically significant results are shown in bold.

**Supplementary Table S4. Subgroup analyses for comparison 2**

| Outcomes                    | N of studies | N of pts in mAb group | N of pts in CCRT group | HR/RR (95% CI)                  | P-value <sup>c</sup> | Heterogeneity  |                      |
|-----------------------------|--------------|-----------------------|------------------------|---------------------------------|----------------------|----------------|----------------------|
|                             |              |                       |                        |                                 |                      | I <sup>2</sup> | P-value <sup>c</sup> |
| <b>Cetuximab subgroup</b>   |              |                       |                        |                                 |                      |                |                      |
| OS                          | 2            | 77                    | 79                     | 0.82 (0.34-1.99) <sup>a</sup>   | 0.67                 | 0%             | 0.68                 |
| DFS                         | 2            | 77                    | 79                     | 0.89 (0.46-1.71) <sup>a</sup>   | 0.72                 | 0%             | 0.61                 |
| skin rash                   | 3            | 135                   | 651                    | 11.13 (6.16-20.10) <sup>b</sup> | <b>&lt; 0.001</b>    | 0%             | 0.96                 |
| mucositis                   | 3            | 135                   | 651                    | 1.62 (1.33-1.98) <sup>b</sup>   | <b>&lt; 0.001</b>    | 0%             | 0.76                 |
| <b>Nimotuzumab subgroup</b> |              |                       |                        |                                 |                      |                |                      |
| OS                          | 2            | 80                    | 84                     | 2.49 (1.18-5.24) <sup>a</sup>   | <b>0.02</b>          | 0%             | 0.83                 |
| DFS                         | 2            | 80                    | 84                     | 2.11 (1.13-3.94) <sup>a</sup>   | <b>0.02</b>          | 0%             | 0.77                 |
| skin rash                   | 3            | 165                   | 656                    | 1.32 (0.22-8.06) <sup>b</sup>   | 0.76                 | 64%            | <b>0.06</b>          |
| mucositis                   | 3            | 165                   | 656                    | 0.92 (0.72 -1.18) <sup>b</sup>  | 0.50                 | 37%            | 0.20                 |

Abbreviations: N = number; pts = patients; mAb = monoclonal antibody; CCRT = concurrent chemoradiotherapy;

HR = hazard ratio; RR = risk ratio; CI = confidence interval; OS = overall survival; DFS = disease-free survival.

<sup>a</sup> Hazard ratio.

<sup>b</sup> Risk ratio.

<sup>c</sup> Statistically significant results are shown in bold.

### Supplementary Table S5. Sensitivity analyses for comparison 1

| Outcomes                                       | N of studies | N of pts in mAb group | N of pts in RT/CRT group | HR (95% CI)      | P-value <sup>a</sup> | Heterogeneity  |                      |
|------------------------------------------------|--------------|-----------------------|--------------------------|------------------|----------------------|----------------|----------------------|
|                                                |              |                       |                          |                  |                      | I <sup>2</sup> | P-value <sup>a</sup> |
| <b>Studies using CRT</b>                       |              |                       |                          |                  |                      |                |                      |
| OS                                             | 9            | 623                   | 1350                     | 0.50 (0.38-0.66) | < <b>0.001</b>       | 0%             | 0.54                 |
| DFS                                            | 6            | 507                   | 1085                     | 0.71 (0.54-0.92) | <b>0.01</b>          | 8%             | 0.36                 |
| <b>Studies with follow-up time ≥ 36 months</b> |              |                       |                          |                  |                      |                |                      |
| OS                                             | 5            | 442                   | 1162                     | 0.48 (0.33-0.69) | < <b>0.001</b>       | 0%             | 0.42                 |
| DFS                                            | 4            | 420                   | 1001                     | 0.73 (0.55-0.98) | <b>0.03</b>          | 0%             | 0.58                 |
| <b>High-quality observational studies</b>      |              |                       |                          |                  |                      |                |                      |
| OS                                             | 7            | 573                   | 1358                     | 0.48 (0.34-0.66) | < <b>0.001</b>       | 1%             | 0.42                 |
| DFS                                            | 6            | 551                   | 1197                     | 0.66 (0.52-0.84) | < <b>0.001</b>       | 11%            | 0.34                 |

Abbreviations: N = number; pts = patients; mAb = monoclonal antibody; RT = radiotherapy; CRT = chemoradiotherapy; HR = hazard ratio; CI = confidence interval; OS = overall survival; DFS = disease-free survival.

<sup>a</sup> Statistically significant results are shown in bold.

**Supplementary Table S6. Sensitivity analyses for comparison 2**

| Outcomes                                       | N of studies | N of pts in mAb group | N of pts in CCRT group | HR (95% CI)      | P-value | Heterogeneity  |         |
|------------------------------------------------|--------------|-----------------------|------------------------|------------------|---------|----------------|---------|
|                                                |              |                       |                        |                  |         | I <sup>2</sup> | P-value |
| <b>Studies using IC before RT</b>              |              |                       |                        |                  |         |                |         |
| OS                                             | 4            | 157                   | 163                    | 1.57 (0.89-2.77) | 0.12    | 20%            | 0.29    |
| DFS                                            | 4            | 157                   | 163                    | 1.40 (0.89-2.20) | 0.15    | 22%            | 0.28    |
| <b>Studies with follow-up time ≥ 36 months</b> |              |                       |                        |                  |         |                |         |
| OS                                             | 5            | 300                   | 735                    | 1.22 (0.82-1.83) | 0.33    | 24%            | 0.26    |
| DFS                                            | 5            | 300                   | 735                    | 1.10 (0.79-1.52) | 0.58    | 35%            | 0.19    |
| <b>High-quality observational studies</b>      |              |                       |                        |                  |         |                |         |
| OS                                             | 4            | 319                   | 816                    | 1.15 (0.79-1.67) | 0.48    | 29%            | 0.24    |
| DFS                                            | 4            | 319                   | 816                    | 1.17 (0.85-1.60) | 0.34    | 48%            | 0.12    |

Abbreviations: N = number; pts = patients; mAb = monoclonal antibody; CCRT = concurrent chemoradiotherapy; HR = hazard ratio; CI = confidence interval; OS = overall survival; DFS = disease-free survival.
